# Supplementary material for: Comparative microsomal proteomics of a model lung cancer cell line NCI-H23 reveals distinct differences between molecular profiles of 3D and 2D cultured cells
Source: PubMed Central journal article supplement (PMC8487723; doi:10.18632/oncotarget.28072), 2021-09-28
Supplement: oncotarget-12-2022-s001.pdf [file oncotarget-12-2022-s001.pdf]

## Comparative microsomal proteomics of a model lung cancer cell line NCI-H23 reveals distinct differences between molecular profiles of 3D and 2D cultured cells

### SUPPLEMENTARY MATERIALS

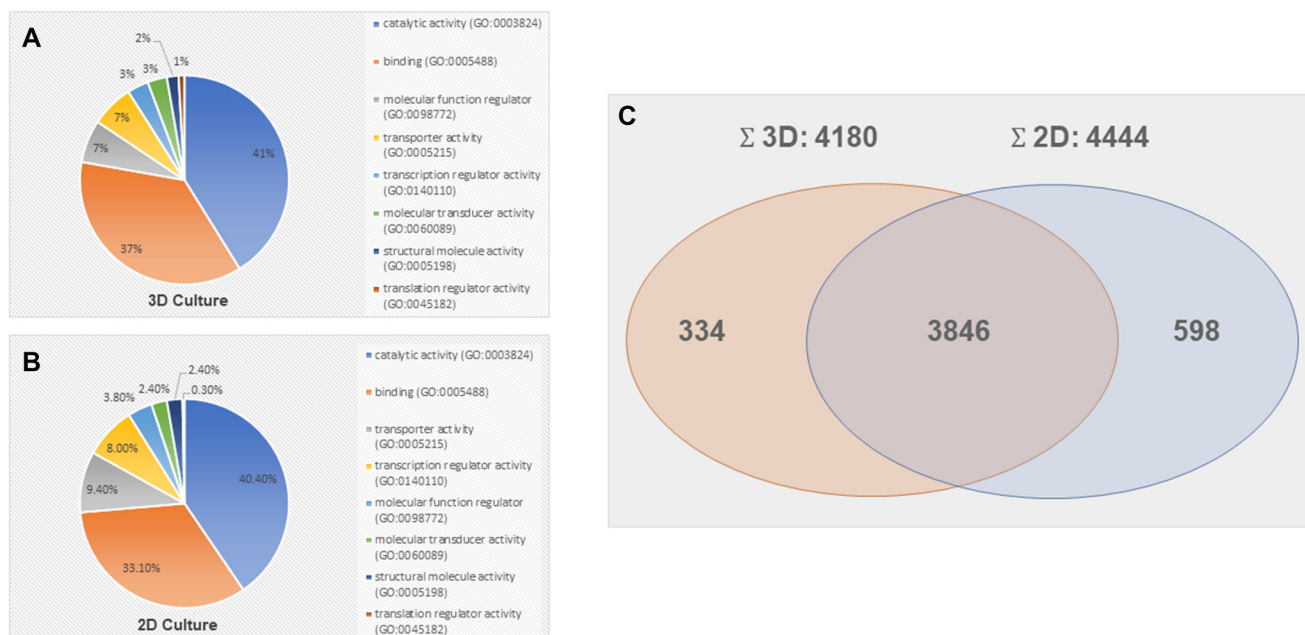

**Supplementary Figure 1:** PANTHER analysis: distribution of molecular functions of differentially expressed proteins identified NCI-H23 cells grown in 3D culture (A) and 2D culture (B). Venn diagrams showing overlapping protein identifications in microsomal fraction obtained from NCI-H23 cells grown in 3D and 2D culture, respectively, corresponding to a total of 4,778 non-redundant protein identifications (C).

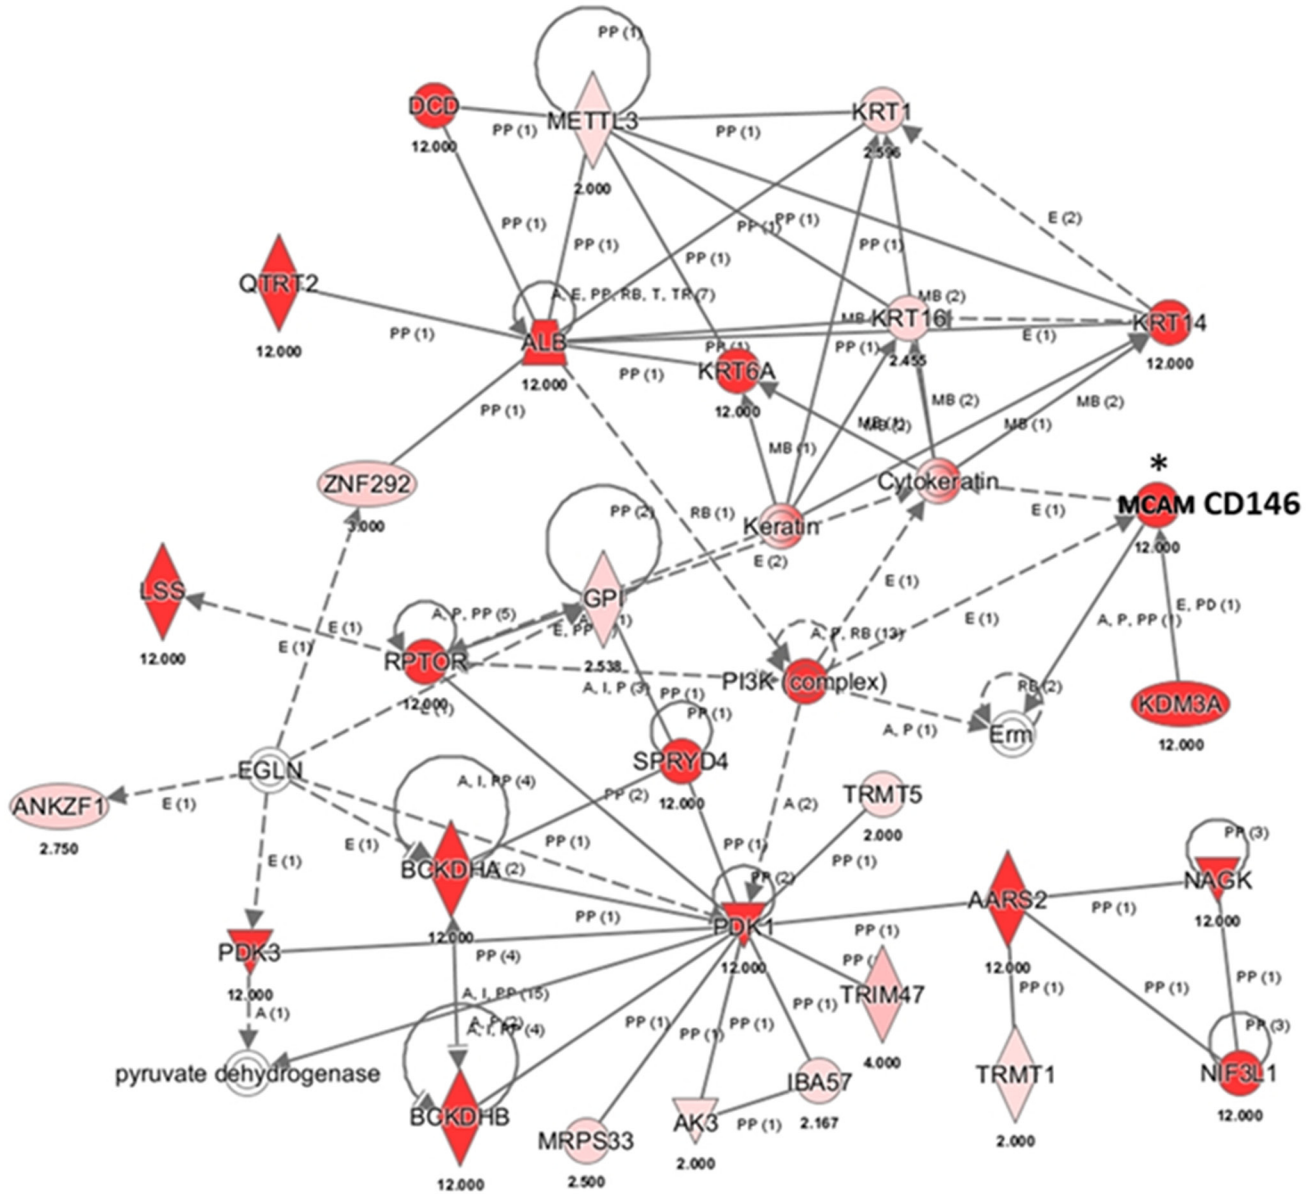

**Supplementary Figure 2: IPA<sup>®</sup> network analysis, 3D cultured cells, network 2, top functions: cancer, angiogenesis.** Red color depicts proteins identified solely in 3D cultured cells, pink color depicts proteins. Solid lines show direct interactions, dotted lines show indirect protein-protein interactions described in the literature. Asterisk marks a CD molecule selected for cross-validation (i.e., CD146-MCAM).

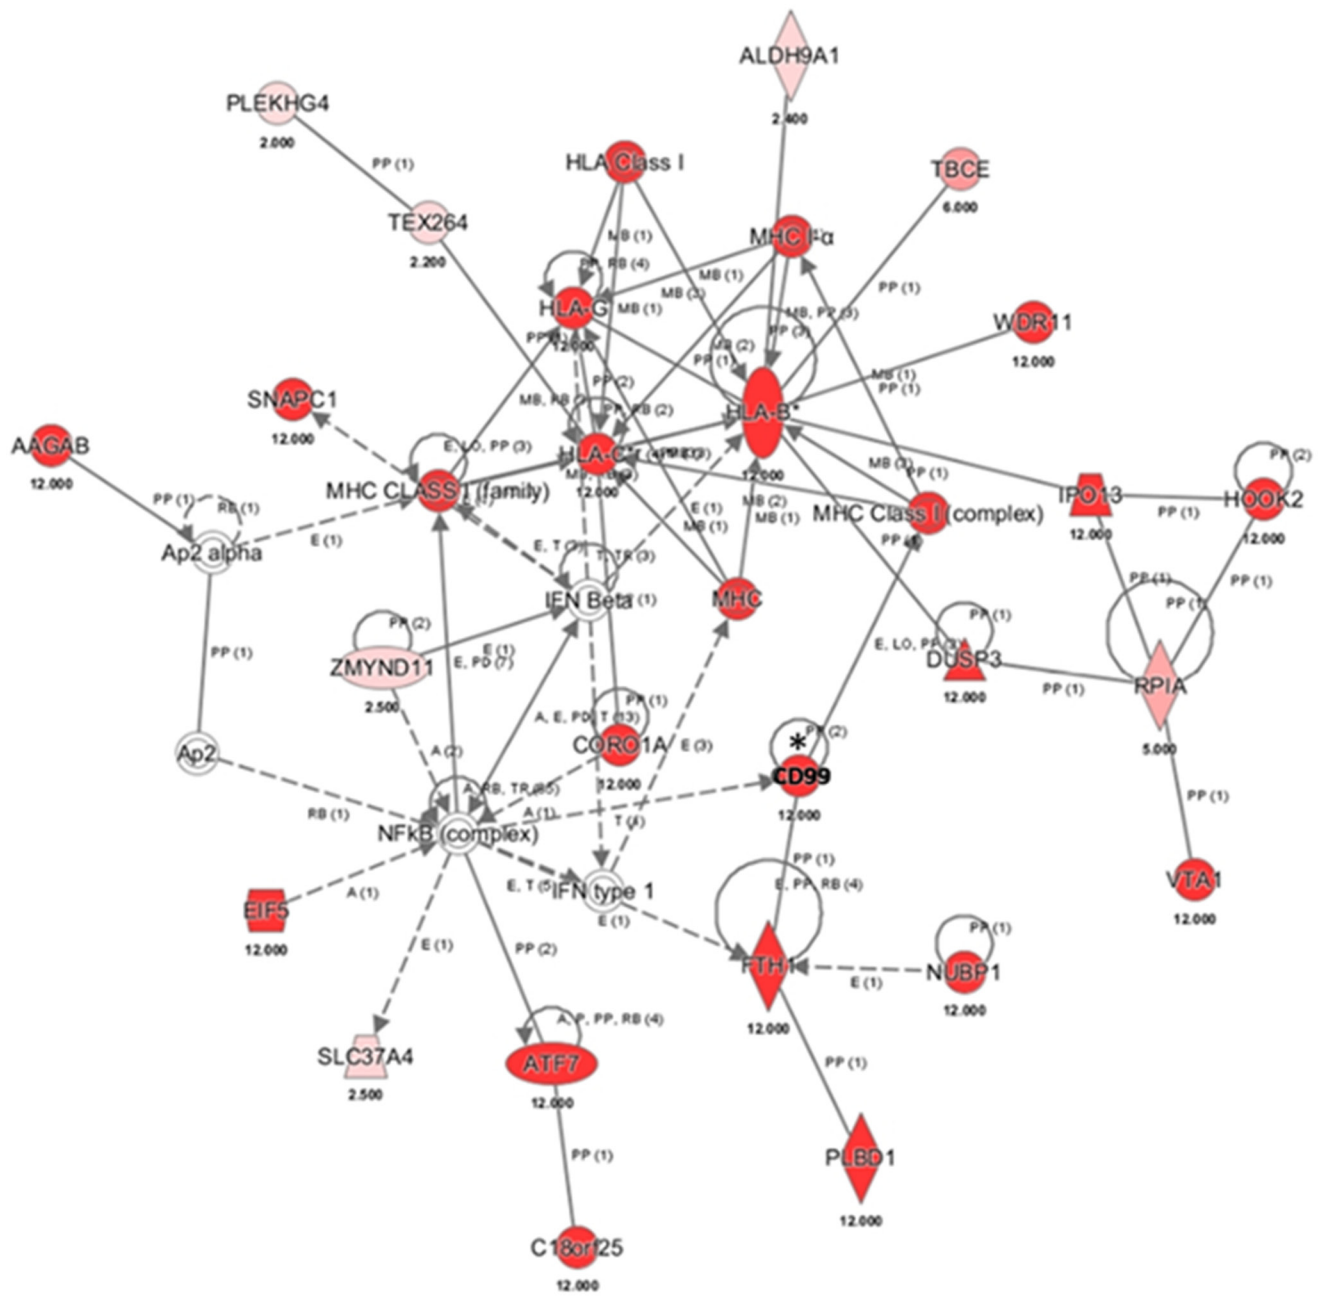

Supplementary Figure 3: IPA<sup>®</sup> network analysis, 3D cultured cells, network 6, top functions: cellular growth, proliferation. Red color depicts proteins identified solely in 3D cultured cells, pink color depicts proteins. Solid lines show direct interactions, dotted lines show indirect protein-protein interactions described in the literature. Asterisk marks a molecule selected for cross-validation (i.e., CD99).

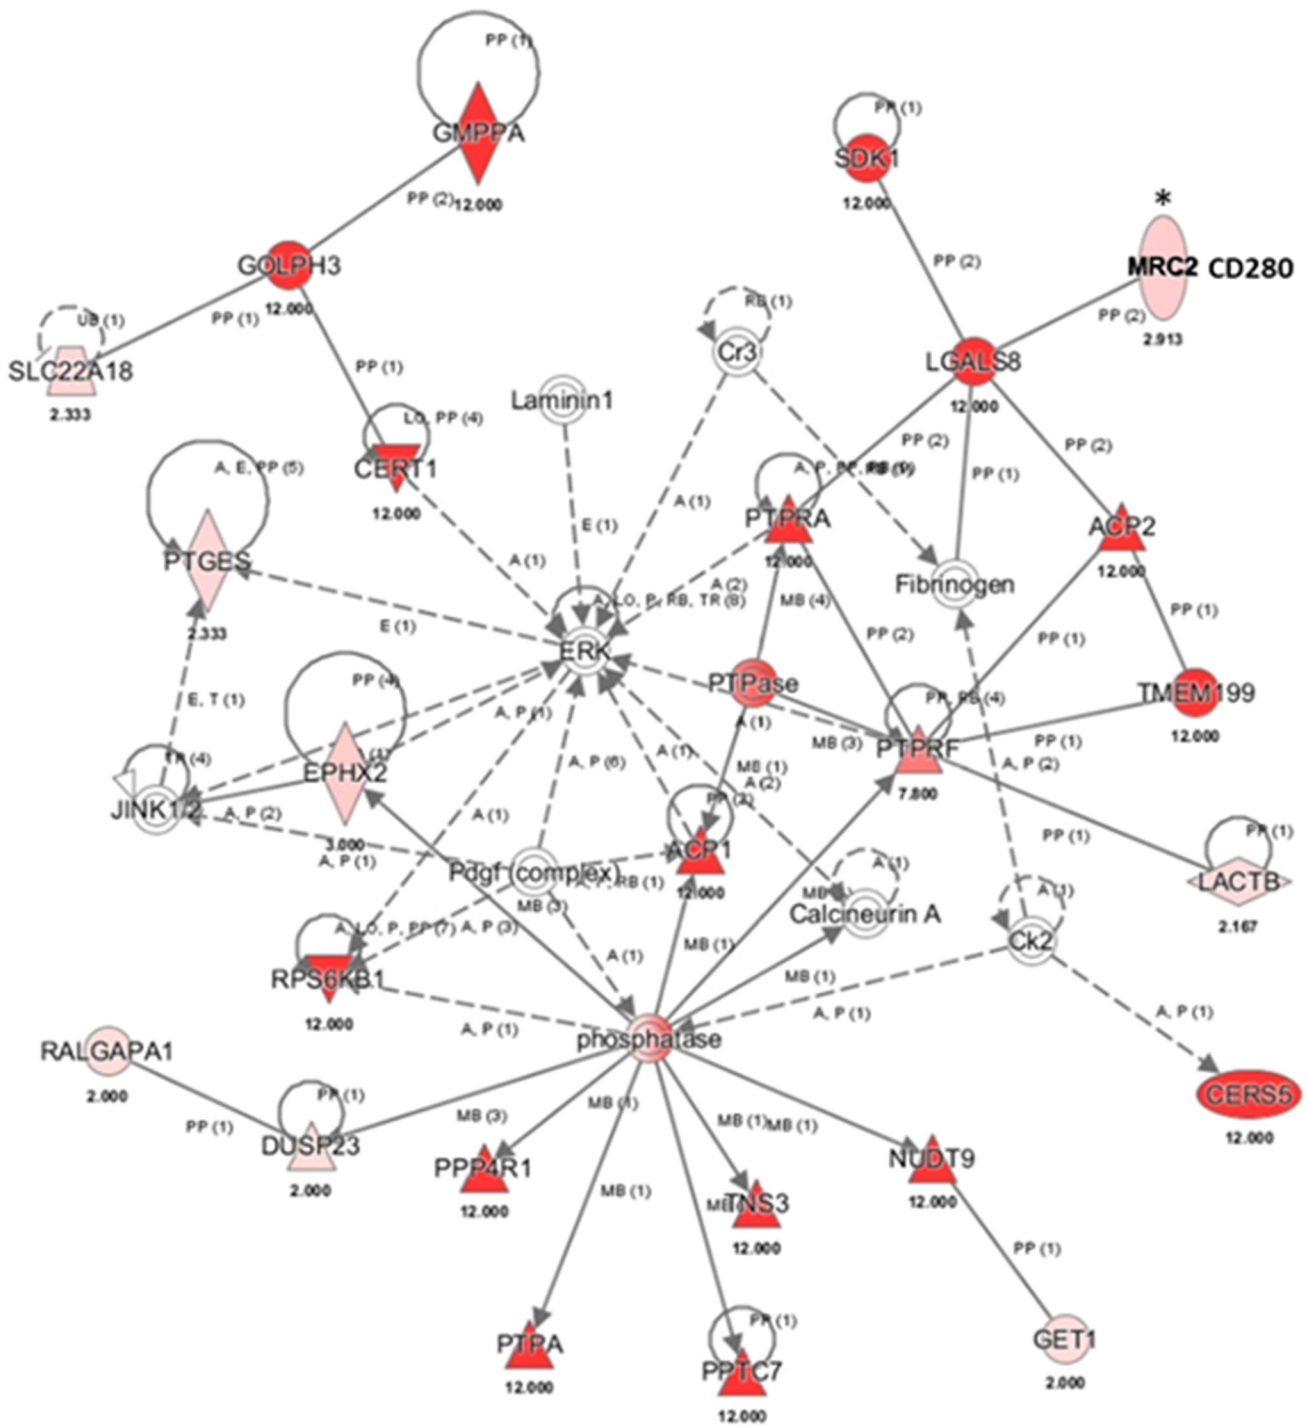

Supplementary Figure 4: IPA<sup>®</sup> network analysis, 3D cultured cells, network 7, top functions: organization, proliferation. Red color depicts proteins identified solely in 3D cultured cells, pink color depicts proteins. Solid lines show direct interactions, dotted lines show indirect protein-protein interactions described in the literature. Asterisk marks a CD molecule (i.e., CD280-MRC2).

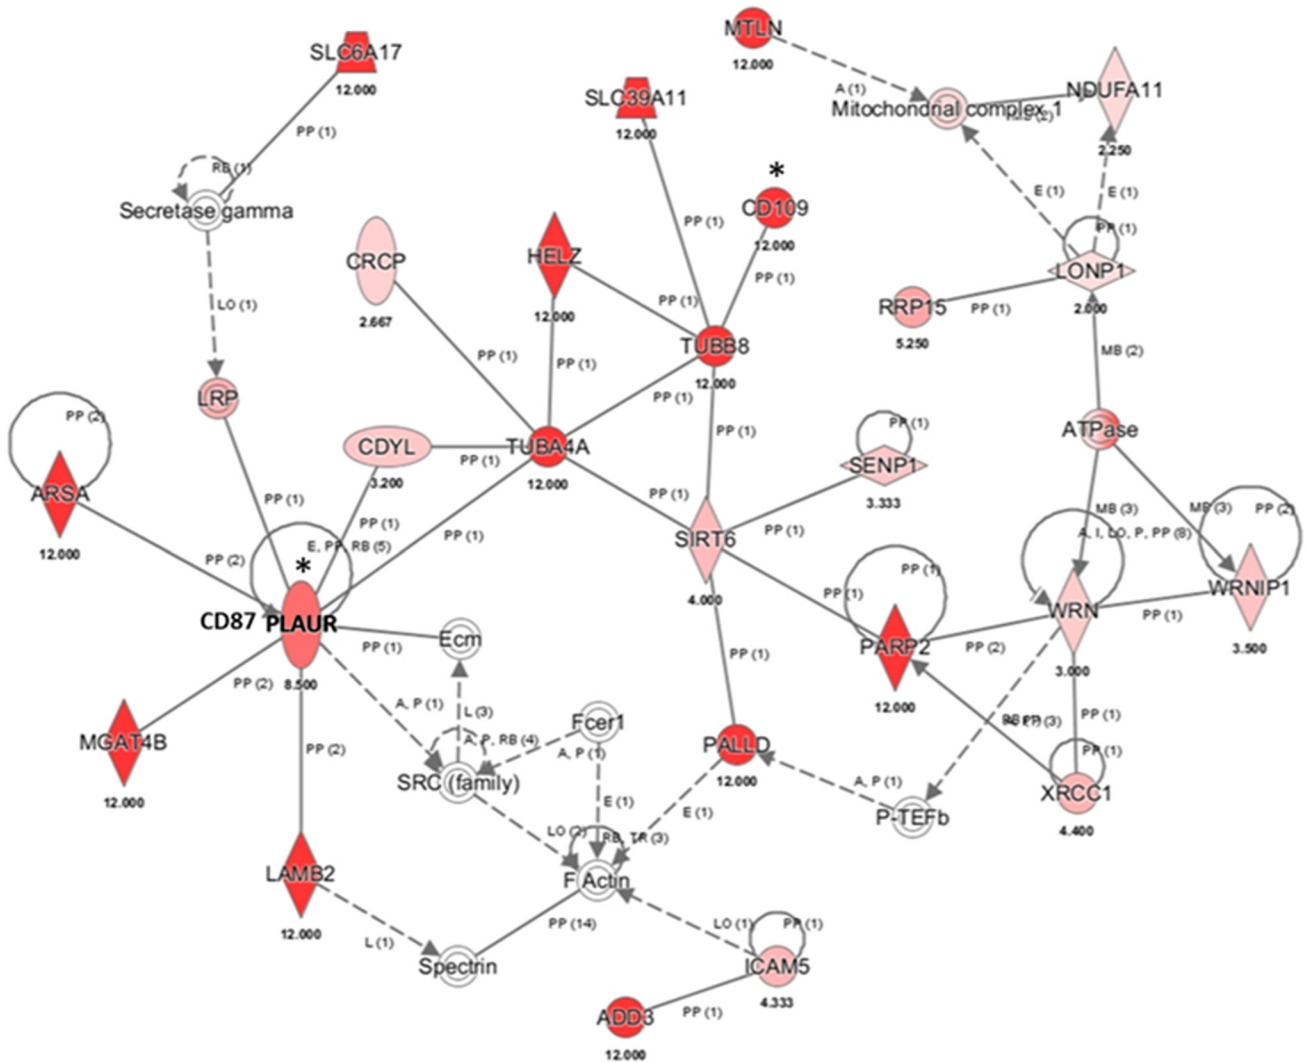

**Supplementary Figure 5: IPA<sup>®</sup> network analysis, 3D cultured cells, network 8, top function: cancer.** Red color depicts proteins identified solely in 3D cultured cells, pink color depicts proteins. Solid lines show direct interactions, dotted lines show indirect protein-protein interactions described in the literature. Asterisk marks a CD molecule (i.e., CD87-PLAUR, CD109).

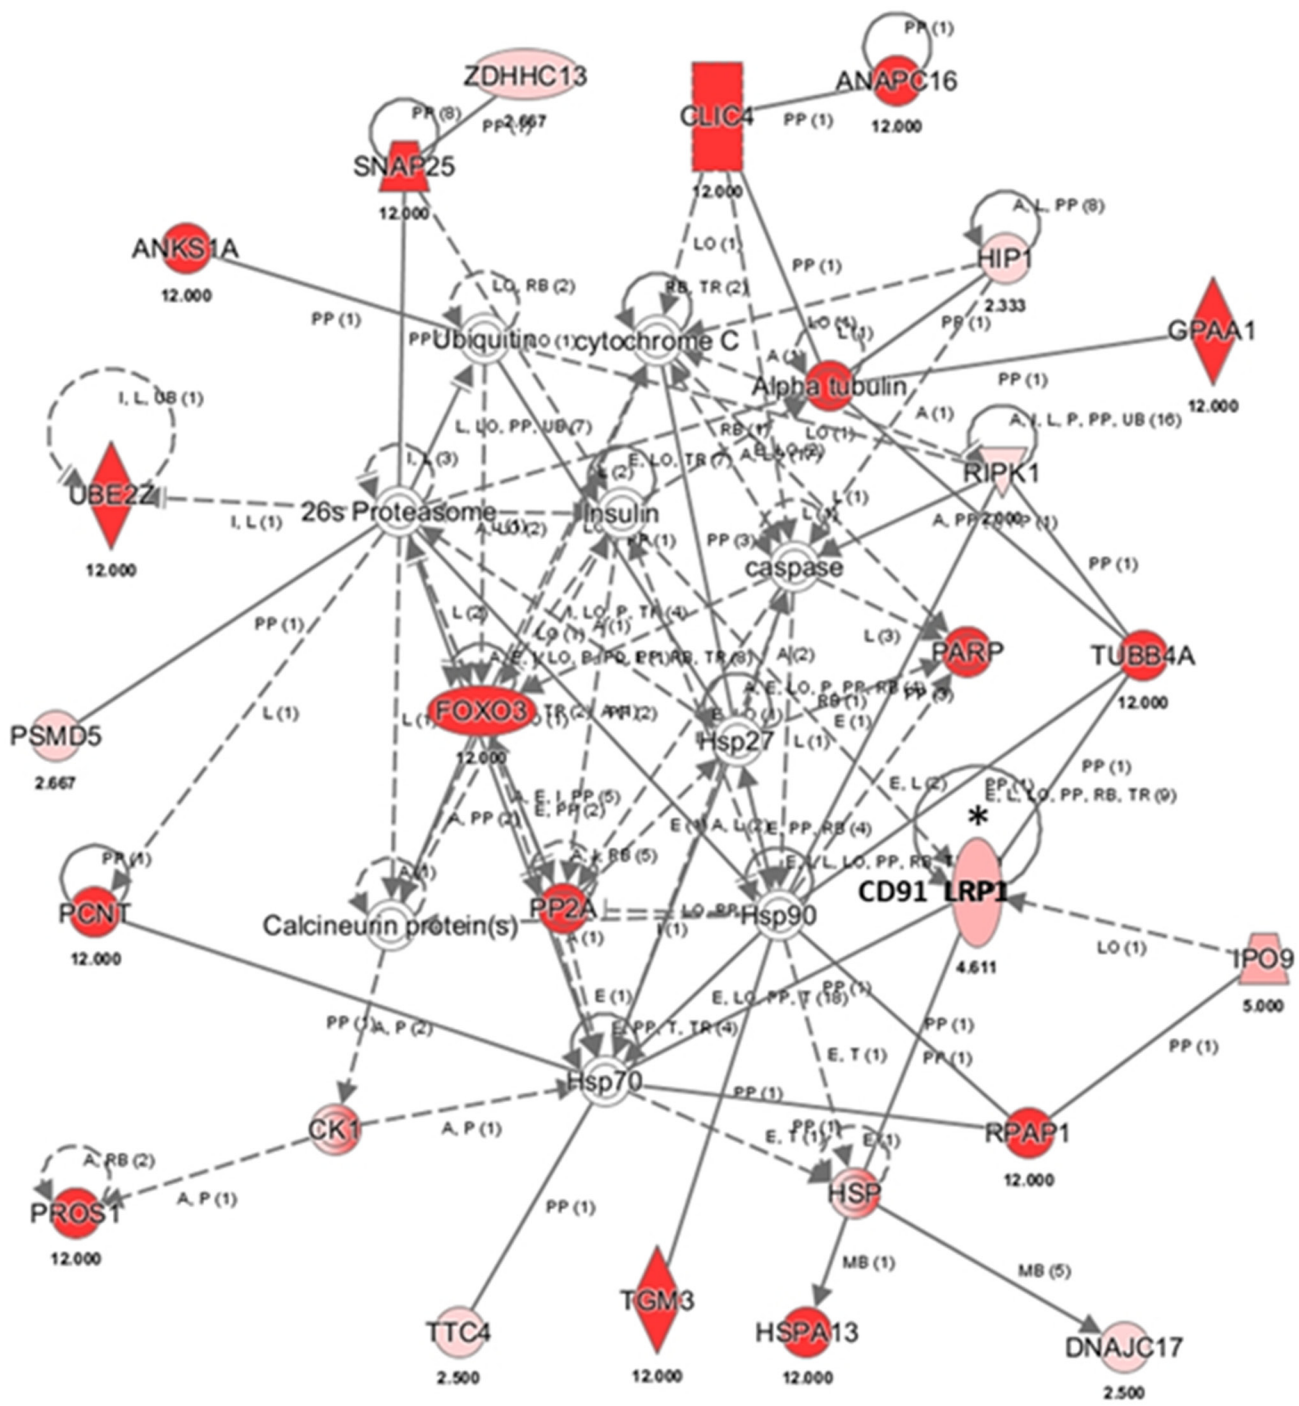

**Supplementary Figure 6: IPA® network analysis, 3D cultured cells, network 10, top functions: organization, angiogenesis.** Red color depicts proteins identified solely in 3D cultured cells, pink color depicts proteins. Solid lines show direct interactions, dotted lines show indirect protein-protein interactions described in the literature. Asterisk marks a CD molecule selected for cross-validation (i.e., CD91-LRP 1).

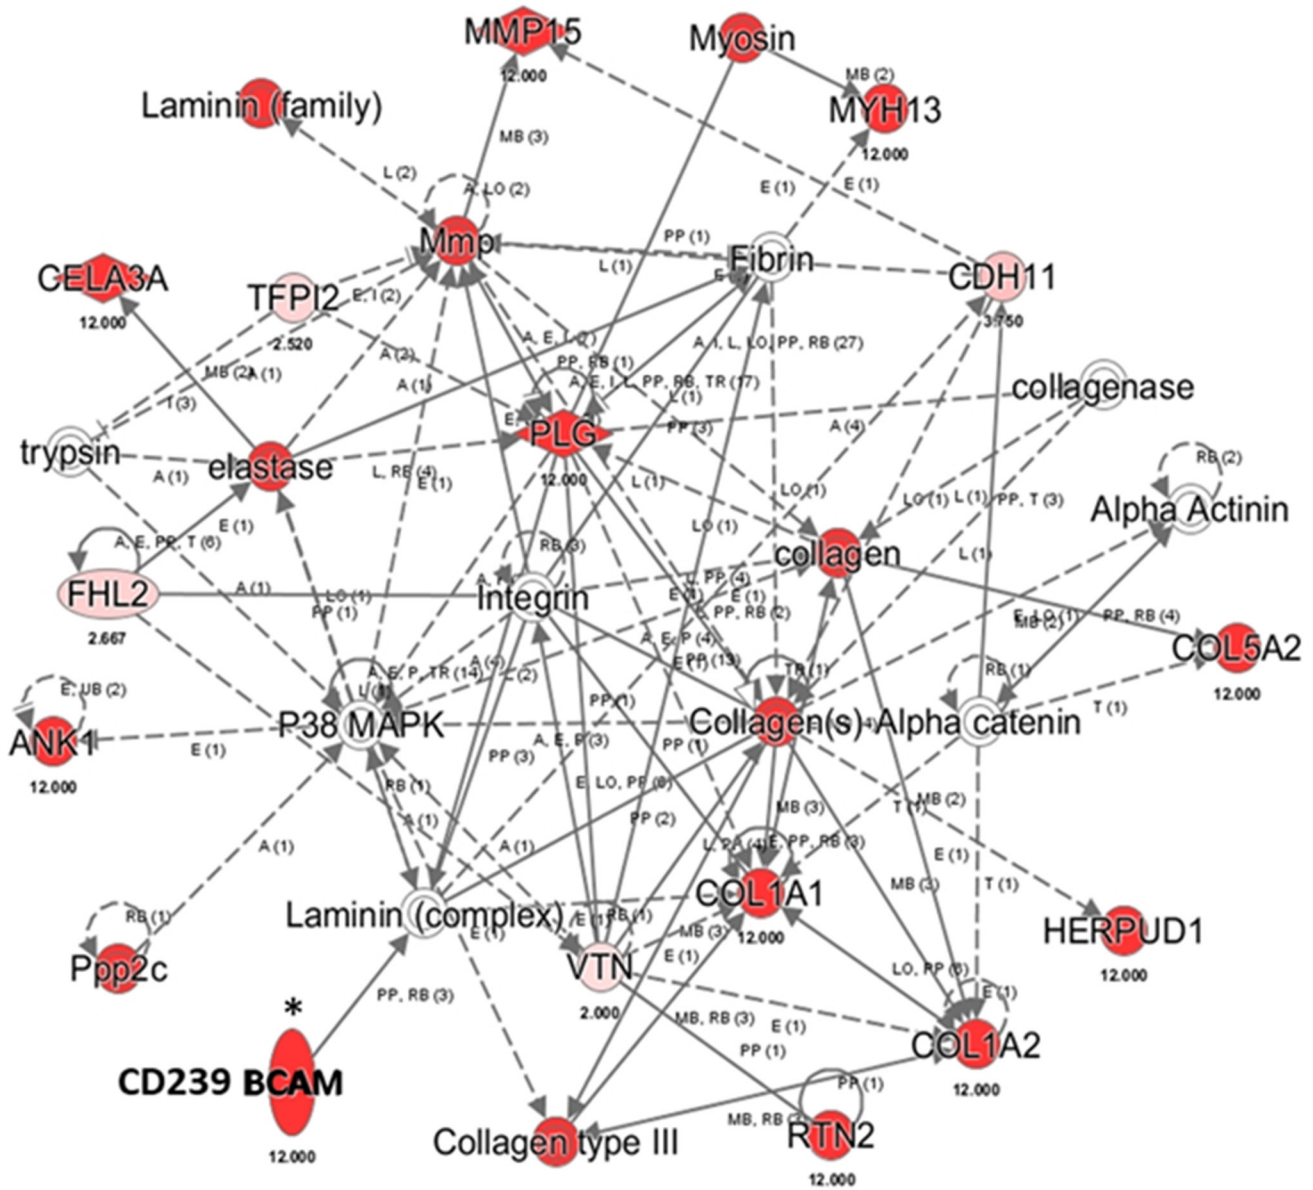

Supplementary Figure 7: IPA<sup>®</sup> network analysis, 3D cultured cells, network 17, top functions: connective tissue disorder, angiogenesis. Red color depicts proteins identified solely in 3D cultured cells, pink color depicts proteins. Solid lines show direct interactions, dotted lines show indirect protein-protein interactions described in the literature. Asterisk marks a CD molecule selected for cross-validation (i.e., CD239-BCAM).

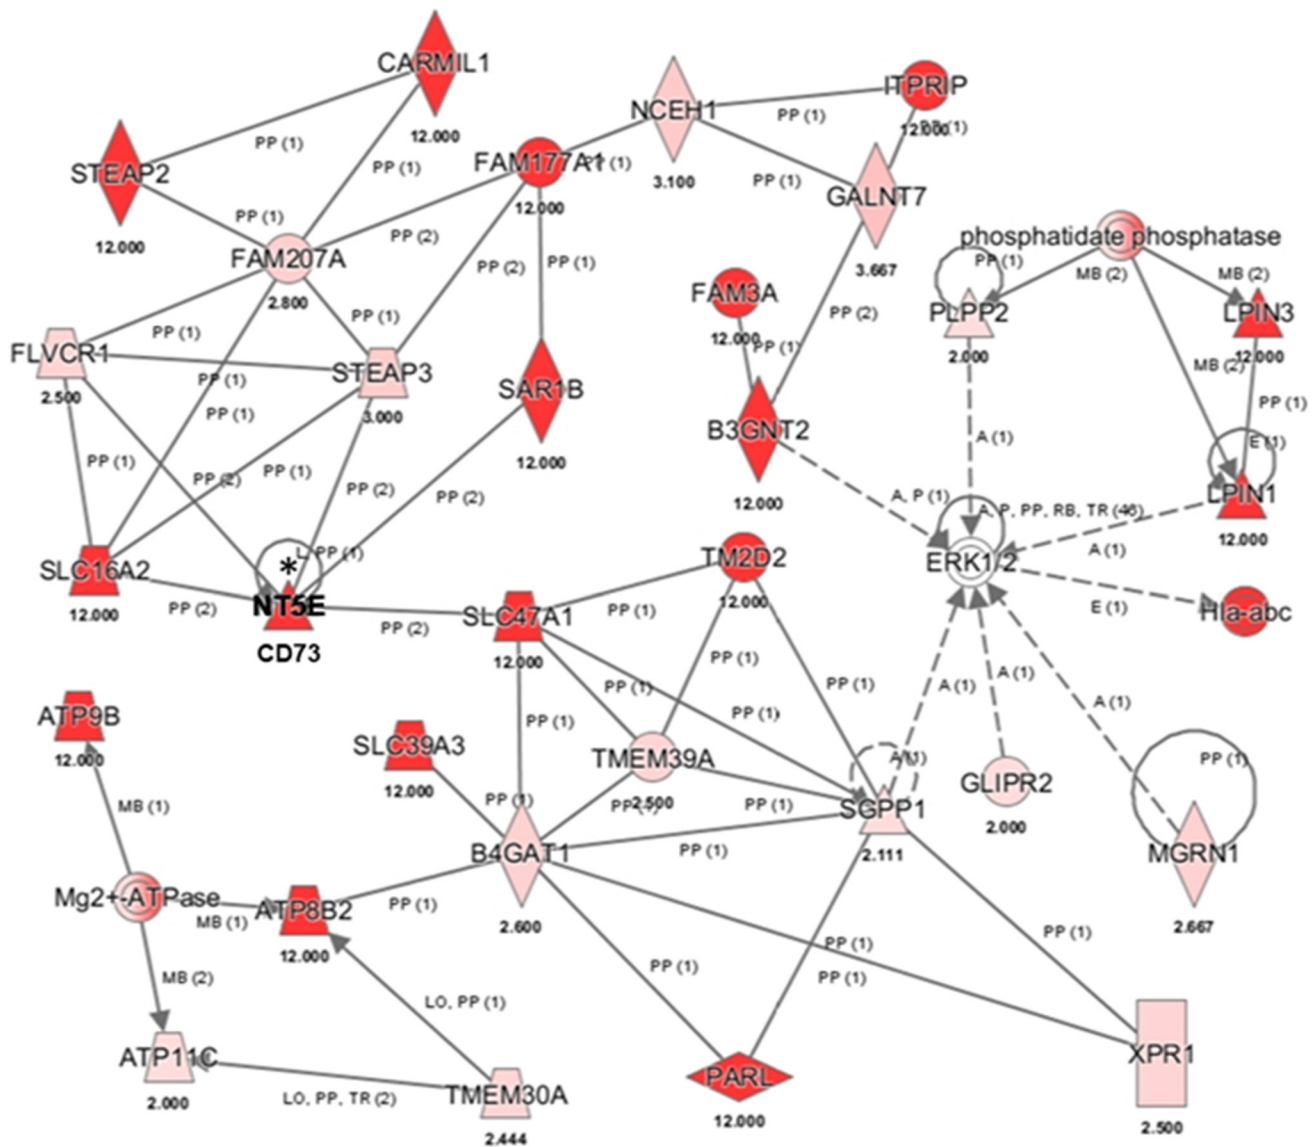

**Supplementary Figure 8: IPA<sup>®</sup> network analysis, 2D cultured cells, network 4, top functions: cancer, metastasis.** Red color depicts proteins identified solely in 3D cultured cells, pink color depicts proteins. Solid lines show direct interactions, dotted lines show indirect protein-protein interactions described in the literature. Asterisk marks a CD molecule (i.e., CD73).



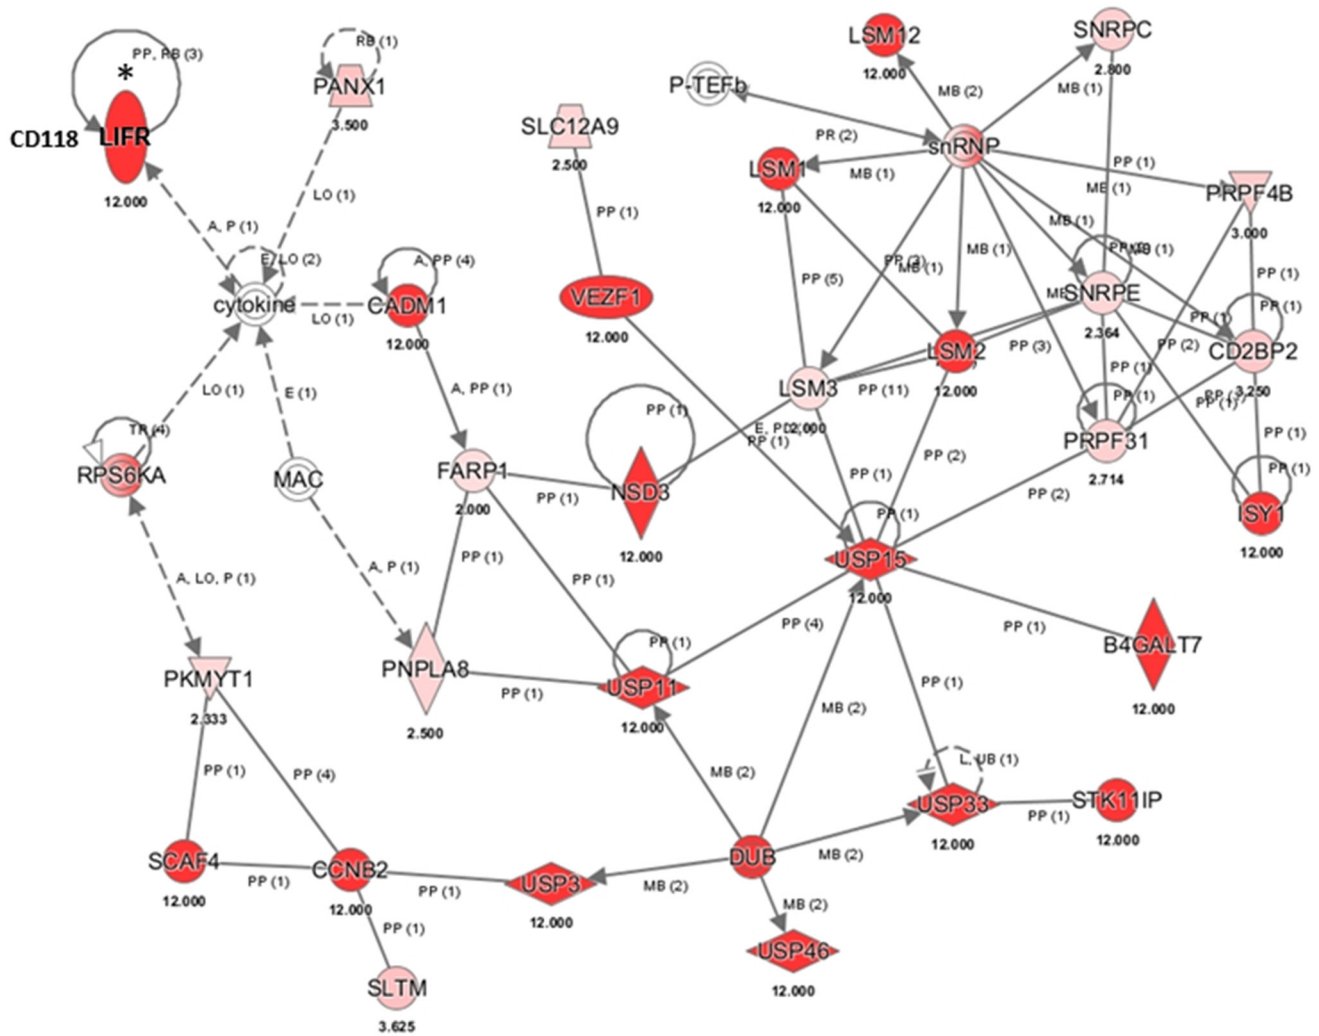

**Supplementary Figure 9: IPA<sup>®</sup> network analysis, 2D cultured cells, network 4, top functions: metastasis, chemotaxis.** Red color depicts proteins identified solely in 3D cultured cells, pink color depicts proteins. Solid lines show direct interactions, dotted lines show indirect protein-protein interactions described in the literature. Asterisk marks a CD molecule (i.e., CD118).

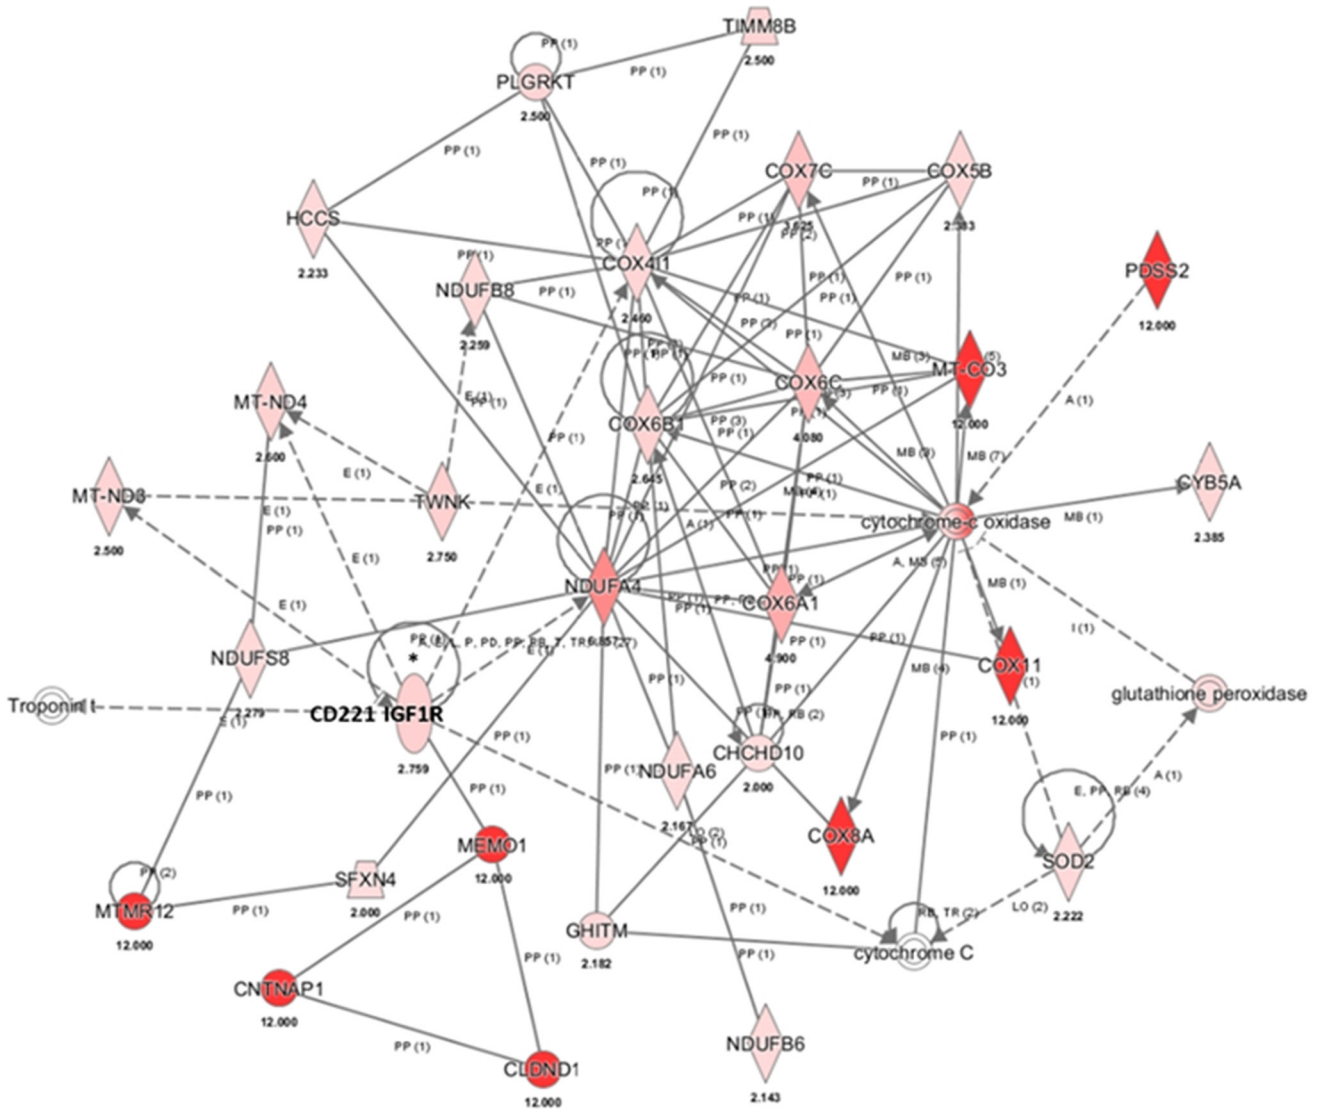

**Supplementary Figure 10: IPA<sup>®</sup> network analysis, 2D cultured cells, network 8, top function: developmental disorder.** Red color depicts proteins identified solely in 3D cultured cells, pink color depicts proteins. Solid lines show direct interactions, dotted lines show indirect protein-protein interactions described in the literature. Asterisk marks a CD molecule (i.e., CD221-IGF1R).

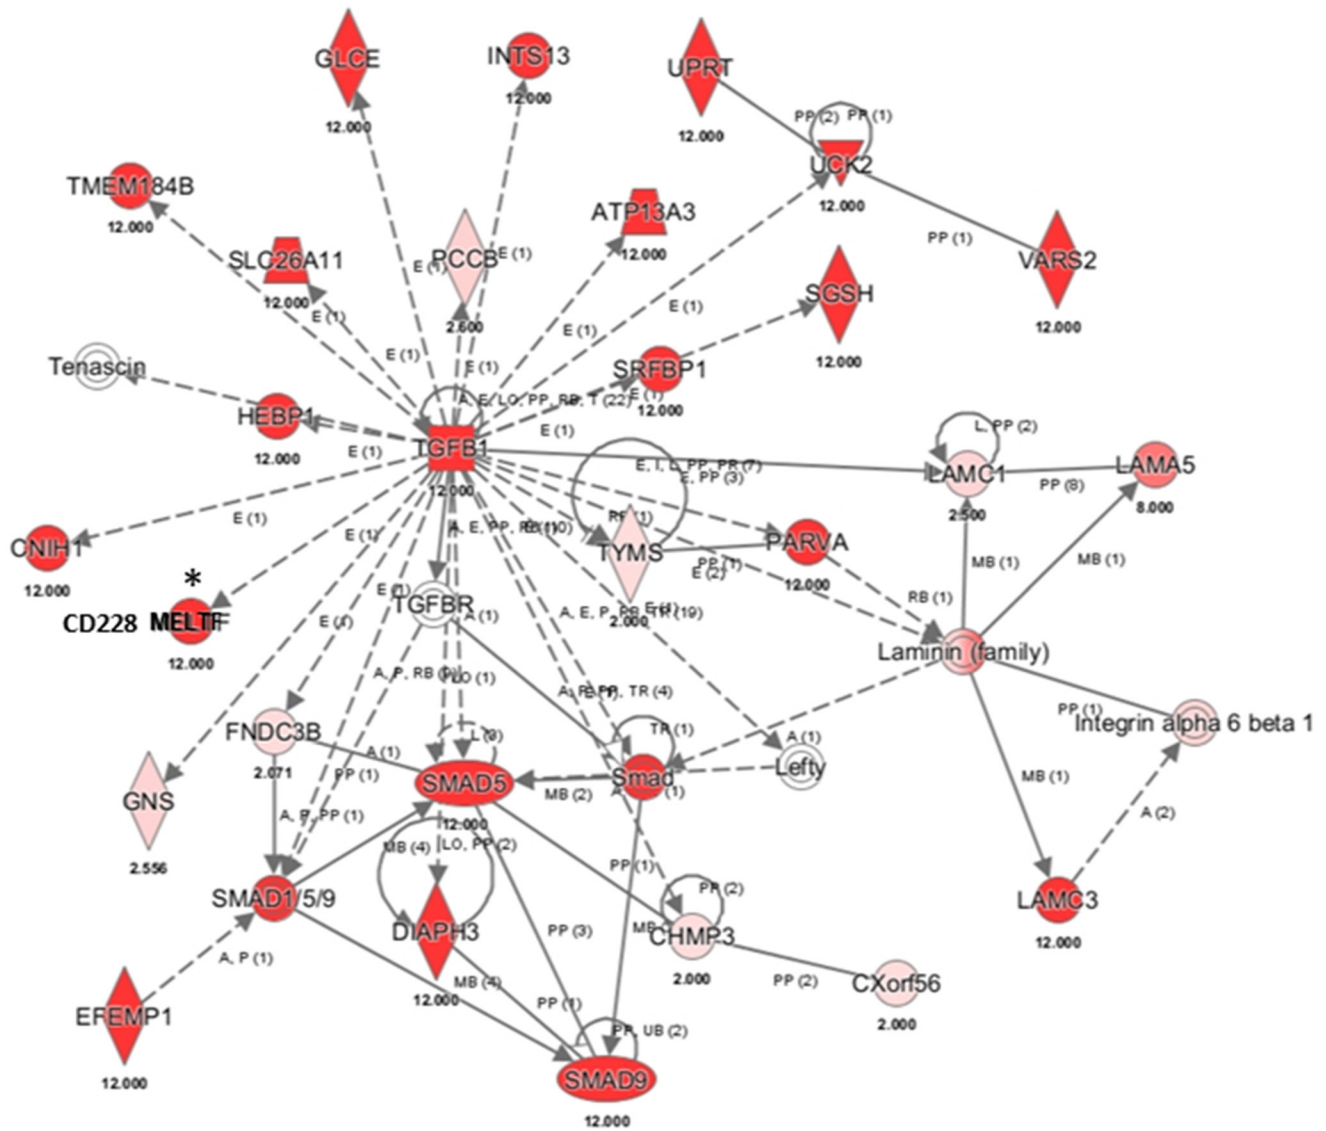

Supplementary Figure 11: IPA<sup>®</sup> network analysis, 2D cultured cells, network 14, top function: cellular growth. Red color depicts proteins identified solely in 3D cultured cells, pink color depicts proteins. Solid lines show direct interactions, dotted lines show indirect protein-protein interactions described in the literature. Asterisk marks a CD molecule (i.e., CD228).

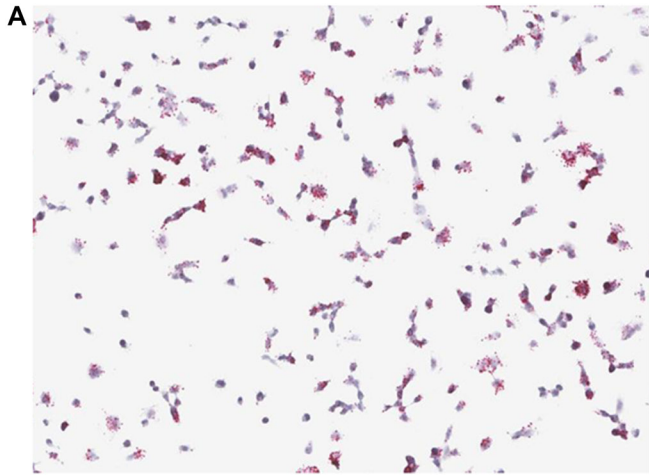

Hs-MCAM/CD146, 10X

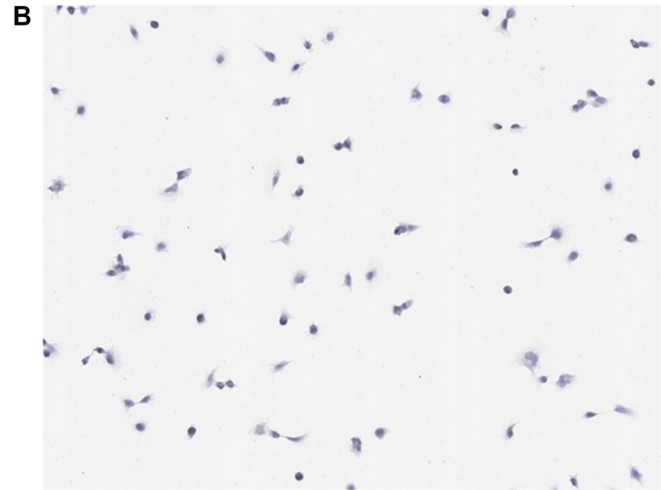

negative control- dapB, 10X

**Supplementary Figure 12: CD146 Staining for Human HT23 cultured cells with RNAscope 2.5 HD red assay.** Image of 10X show MCAM/CD146 probe detecting low to moderate RNA staining in most of the cultured cells (A). Representative image of 10X show negative control (B).

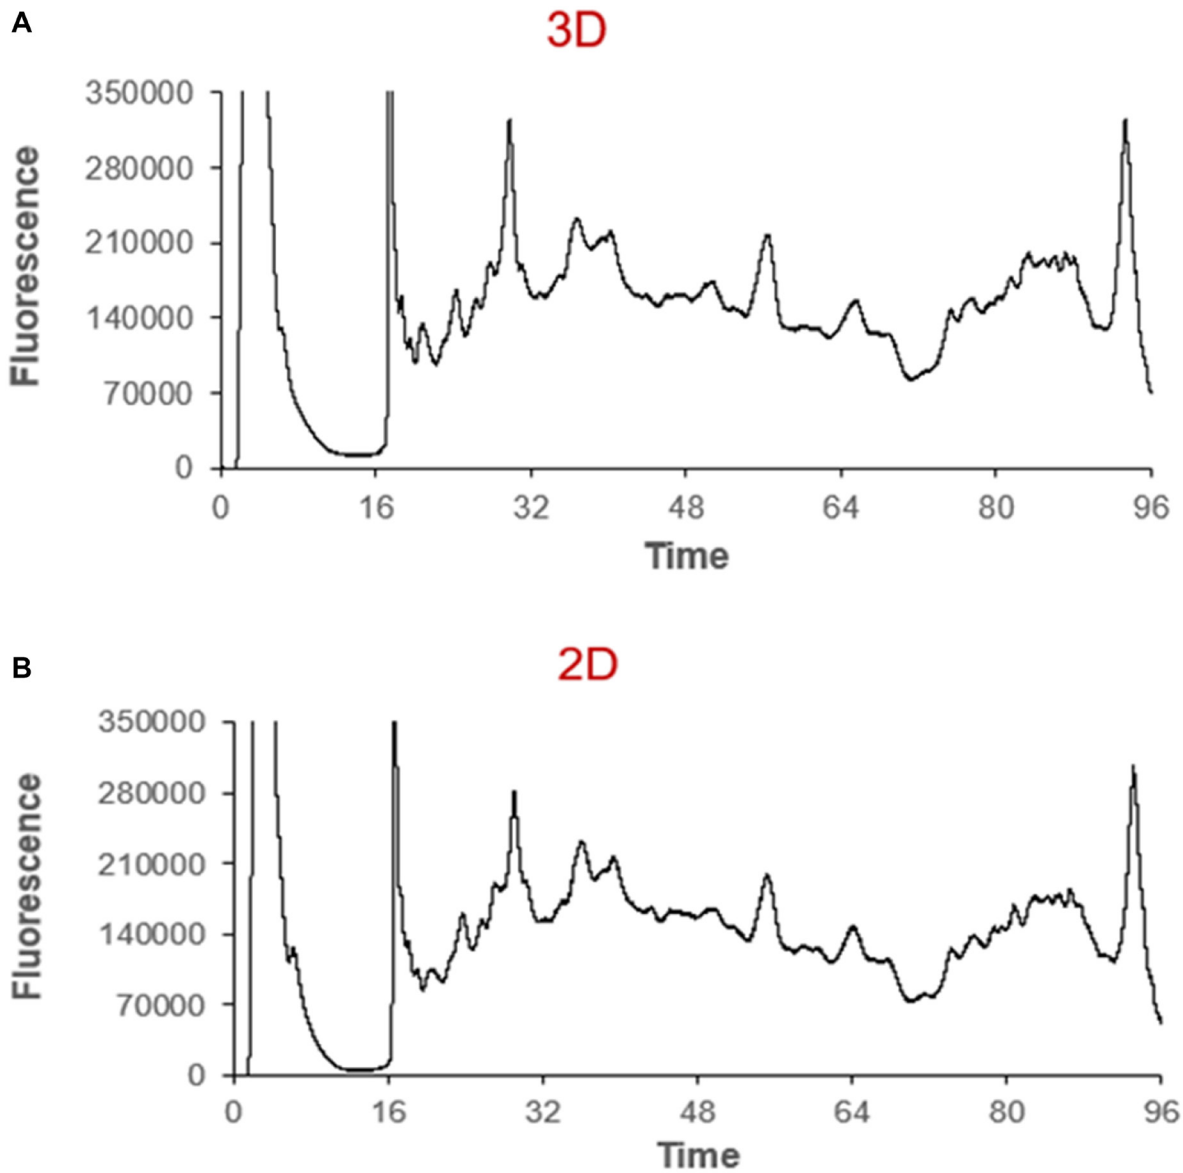

**Supplementary Figure 13: SCX fractionation.** (A) SCX chromatogram depicting separation of peptides generated from 3D-cultured NCI-H23 cells. (B) SCX chromatogram depicting separation of peptides generated from 2D-cultured NCI-H23 cells.

**Supplementary Table 1: Proteins groups identified in membrane fraction of 2D-cultured NCI-H23 cells, showing subcellular location data for a given protein group currently available in human proteom atlas (HPA). See Supplementary Table 1**

**Supplementary Table 2: Proteins groups identified in membrane fraction of 2D-cultured NCI-H23 cells, showing subcellular location data for a given protein group currently available in human proteom atlas (HPA). See Supplementary Table 2**

**Supplementary Table 3: Peptide groups identified in membrane fraction of 3D-cultured NCI-H23 cells. See Supplementary Table 3**

**Supplementary Table 4: Peptide groups identified in membrane fraction of 2D-cultured NCI-H23 cells. See Supplementary Table 4**

**Supplementary Table 5: Integral membrane proteins identified in 3D-cultured NCI-H23 cells. See Supplementary Table 5**

**Supplementary Table 6: Integral membrane proteins identified in 2D-cultured NCI-H23 cells. See Supplementary Table 6**

**Supplementary Table 7: Cell surface proteins, including CD molecules, identified in 3D-cultured NCI-H23 cells. See Supplementary Table 7**

**Supplementary Table 8: Cell surface proteins, including CD molecules, identified in 2D-cultured NCI-H23 cells. See Supplementary Table 8**

**Supplementary Table 9: Protein groups identified in both 3D- and 2D-cultured NCI-H23 cells. See Supplementary Table 9**

**Supplementary Table 10: Protein groups identified exclusively in 3D-cultured NCI-H23 cells. See Supplementary Table 10**

**Supplementary Table 11: Protein groups identified exclusively in 2D-cultured NCI-H23 cells. See Supplementary Table 11**

**Supplementary Table 12: Proteins regulated in culture-dependent manmer in 3D and 2D cultured NCI-H23 cells using shotgun microsomal proteomics. See Supplementary Table 12**

**Supplementary Table 13: Cell surface proteins identified exclusively in 3D-cultured NCI-H23 cells**

| Accession | Description                                                                 | Gene    | # PSMs | CD      | GPI |
|-----------|-----------------------------------------------------------------------------|---------|--------|---------|-----|
| Q9UQ53    | Alpha-1,3-mannosyl-glycoprotein 4-beta-N-acetylglucosaminyltransferase B OS | MGAT4B  | 2      | no      | 0   |
| P02765    | Alpha-2-HS-glycoprotein OS                                                  | AHSG    | 15     | no      | 0   |
| O95477    | ATP-binding cassette sub-family A member 1 OS                               | ABCA1   | 3      | no      | 0   |
| P50895    | Basal cell adhesion molecule OS                                             | BCAM    | 26     | CD239   | 0   |
| Q6YHK3    | CD109 antigen OS                                                            | CD109   | 21     | CD109   | 1   |
| P14209    | CD99 antigen OS                                                             | CD99    | 22     | CD99    | 0   |
| P43121    | Cell surface glycoprotein MUC18 OS                                          | MCAM    | 72     | CD146   | 0   |
| P02452    | Collagen alpha-1(I) chain OS                                                | COL1A1  | 30     | no      | 0   |
| P08123    | Collagen alpha-2(I) chain OS                                                | COL1A2  | 17     | no      | 0   |
| P05997    | Collagen alpha-2(V) chain OS                                                | COL5A2  | 2      | no      | 0   |
| Q9UJ14    | Gamma-glutamyltransferase 7 OS                                              | GGT7    | 3      | no      | 0   |
| P48723    | Heat shock 70 kDa protein 13 OS                                             | HSPA13  | 2      | no      | 0   |
| Q68CP4    | Heparan-alpha-glucosaminide N-acetyltransferase OS                          | HGSNAT  | 2      | no      | 0   |
| Q9Y287    | Integral membrane protein 2B OS                                             | ITM2B   | 2      | no      | 0   |
| P78552    | Interleukin-13 receptor subunit alpha-1 OS                                  | IL13RA1 | 2      | CD213a1 | 0   |
| Q7Z4H8    | KDEL motif-containing protein 2 OS                                          | KDEL2   | 3      | no      | 0   |
| P55268    | Laminin subunit beta-2 OS                                                   | LAMB2   | 3      | no      | 0   |
| P11117    | Lysosomal acid phosphatase OS                                               | ACP2    | 4      | no      | 0   |
| Q9UJJ9    | N-acetylglucosamine-1-phosphotransferase subunit gamma OS                   | GNPTG   | 2      | no      | 0   |
| Q8N2Q7    | Neuroigin-1 OS                                                              | NLGN1   | 3      | no      | 0   |
| Q6P4A8    | Phospholipase B-like 1 OS                                                   | PLBD1   | 4      | no      | 0   |
| Q7Z5N4    | Protein sidekick-1 OS                                                       | SDK1    | 2      | no      | 0   |
| Q8NHP8    | Putative phospholipase B-like 2 OS                                          | PLBD2   | 6      | no      | 0   |
| P18433    | Receptor-type tyrosine-protein phosphatase alpha OS                         | PTPRA   | 5      | no      | 0   |
| O75094    | Slit homolog 3 protein OS                                                   | SLIT3   | 5      | no      | 0   |
| P53794    | Sodium/myo-inositol cotransporter OS                                        | SLC5A3  | 2      | no      | 0   |
| Q9UGH3    | Solute carrier family 23 member 2 OS                                        | SLC23A2 | 3      | no      | 0   |
| P10646    | Tissue factor pathway inhibitor OS                                          | TFPI    | 2      | no      | 0   |
| P68366    | Tubulin alpha-4A chain OS                                                   | TUBA4A  | 620    | no      | 0   |
| P04350    | Tubulin beta-4A chain OS                                                    | TUBB4A  | 1623   | no      | 0   |
| Q13433    | Zinc transporter ZIP6 OS                                                    | SLC39A6 | 3      | no      | 0   |

**Supplementary Table 14: Cell surface proteins identified exclusively in 2D-cultured NCI-H23 cells**

| Accession # | Description                                                              | Gene     | # PSMs | CD    | GPI |
|-------------|--------------------------------------------------------------------------|----------|--------|-------|-----|
| P21589      | 5'-nucleotidase OS                                                       | NT5E     | 8      | CD73  | 1   |
| Q92485      | Acid sphingomyelinase-like phosphodiesterase 3b OS                       | SMPDL3B  | 2      | no    | 0   |
| O43306      | Adenylate cyclase type 6 OS                                              | ADCY6    | 3      | no    | 0   |
| P06280      | Alpha-galactosidase A OS                                                 | GLA      | 2      | no    | 0   |
| A1A5B4      | Anoctamin-9 OS                                                           | ANO9     | 3      | no    | 0   |
| Q9H6X2      | Anthrax toxin receptor 1 OS                                              | ANTXR1   | 6      | no    | 0   |
| Q9NR09      | Baculoviral IAP repeat-containing protein 6 OS                           | BIRC6    | 3      | no    | 0   |
| P98160      | Basement membrane-specific heparan sulfate proteoglycan core protein OS  | HSPG2    | 2      | no    | 0   |
| Q13286      | Battenin OS                                                              | CLN3     | 3      | no    | 0   |
| Q9BY67      | Cell adhesion molecule 1 OS                                              | CADM1    | 7      | no    | 0   |
| Q9P2E5      | Chondroitin sulfate glucuronyltransferase OS                             | CHPF2    | 2      | no    | 0   |
| Q9NY35      | Claudin domain-containing protein 1 OS                                   | CLDND1   | 3      | no    | 0   |
| P78357      | Contactin-associated protein 1 OS                                        | CNTNAP1  | 6      | no    | 0   |
| O94923      | D-glucuronyl C5-epimerase OS                                             | GLCE     | 2      | no    | 0   |
| Q12805      | EGF-containing fibulin-like extracellular matrix protein 1 OS            | EFEMP1   | 4      | no    | 0   |
| Q9GZR5      | Elongation of very long chain fatty acids protein 4 OS                   | ELOVL4   | 3      | no    | 0   |
| P29323      | Ephrin type-B receptor 2 OS                                              | EPHB2    | 18     | no    | 0   |
| P41440      | Folate transporter 1 OS                                                  | SLC19A1  | 18     | no    | 0   |
| P05534      | HLA class I histocompatibility antigen, A-24 alpha chain OS              | HLA-A    | 250    | no    | 0   |
| P01889      | HLA class I histocompatibility antigen, B-7 alpha chain OS               | HLA-B    | 151    | no    | 0   |
| P04222      | HLA class I histocompatibility antigen, Cw-3 alpha chain OS              | HLA-C    | 137    | no    | 0   |
| P10321      | HLA class I histocompatibility antigen, Cw-7 alpha chain OS              | HLA-C    | 245    | no    | 0   |
| Q12891      | Hyaluronidase-2 OS                                                       | HYAL2    | 2      | no    | 1   |
| Q8IWB1      | Inositol 1,4,5-trisphosphate receptor-interacting protein OS             | ITPRIP   | 14     | no    | 0   |
| Q6UWB1      | Interleukin-27 receptor subunit alpha OS                                 | IL27RA   | 2      | no    | 0   |
| P42702      | Leukemia inhibitory factor receptor OS                                   | LIFR     | 2      | CD118 | 0   |
| Q7Z4F1      | Low-density lipoprotein receptor-related protein 10 OS                   | LRP10    | 7      | no    | 0   |
| P08582      | Melanotransferrin OS                                                     | MELTF    | 5      | CD228 | 1   |
| Q9UNW1      | Multiple inositol polyphosphate phosphatase 1 OS                         | MINPP1   | 8      | no    | 0   |
| P34059      | N-acetylgalactosamine-6-sulfatase OS                                     | GALNS    | 2      | no    | 0   |
| Q9UK23      | N-acetylglucosamine-1-phosphodiester alpha-N-acetylglucosaminidase OS    | NAGPA    | 5      | no    | 0   |
| Q92626      | Peroxidasin homolog OS                                                   | PXDN     | 2      | no    | 0   |
| P53801      | Pituitary tumor-transforming gene 1 protein-interacting protein OS       | PTTG1IP  | 4      | no    | 0   |
| Q9Y4D7      | Plexin-D1 OS                                                             | PLXND1   | 2      | no    | 0   |
| Q5SGD2      | Protein phosphatase 1L OS                                                | PPM1L    | 2      | no    | 0   |
| Q96NT5      | Proton-coupled folate transporter OS                                     | SLC46A1  | 2      | no    | 0   |
| Q15262      | Receptor-type tyrosine-protein phosphatase kappa OS                      | PTPRK    | 2      | no    | 0   |
| Q8WTV0      | Scavenger receptor class B member 1 OS                                   | SCARB1   | 5      | no    | 0   |
| Q9H2H9      | Sodium-coupled neutral amino acid transporter 1 OS                       | SLC38A1  | 2      | no    | 0   |
| Q9BXS9      | Solute carrier family 26 member 6 OS                                     | SLC26A6  | 6      | no    | 0   |
| Q12770      | Sterol regulatory element-binding protein cleavage-activating protein OS | SCAP     | 5      | no    | 0   |
| P50443      | Sulfate transporter OS                                                   | SLC26A2  | 9      | no    | 0   |
| Q8TB96      | T-cell immunomodulatory protein OS                                       | ITFG1    | 5      | no    | 0   |
| Q96AE7      | Tetratricopeptide repeat protein 17 OS                                   | TTC17    | 3      | no    | 0   |
| P01137      | Transforming growth factor beta-1 OS                                     | TGFB1    | 6      | no    | 0   |
| Q9BVX2      | Transmembrane protein 106C OS                                            | TMEM106C | 13     | no    | 0   |
| Q9H813      | Transmembrane protein 206 OS                                             | TMEM206  | 3      | no    | 0   |
| Q8NBN3      | Transmembrane protein 87A OS                                             | TMEM87A  | 12     | no    | 0   |
| Q96K49      | Transmembrane protein 87B OS                                             | TMEM87B  | 6      | no    | 0   |
| Q9NY97      | UDP-GlcNAc:betaGal beta-1,3-N-acetylglucosaminyltransferase 2 OS         | B3GNT2   | 3      | no    | 0   |



## Supplementary Table 15A: Top biological function enriched in 3D cultured cells

### CONNECTIVE TISSUE DEVELOPMENT

| Functions Annotation                     | p-value  | # Molecules | Molecules                                                                                                                                                                                                                                                          | CD Molecules      |
|------------------------------------------|----------|-------------|--------------------------------------------------------------------------------------------------------------------------------------------------------------------------------------------------------------------------------------------------------------------|-------------------|
| Cell proliferation of fibroblasts        | 1.19E-07 | 31          | ACP1,ALB,ARHGEF11,ARID3A,CEBPB,CTC1,EZH2,FADD,FANCD2,FTH1,GPI,HDGFL2,HGS,HMOX1,KDM5A,KMT2C,KMT5B,LATS1,MEN1,MORC3,NDRG1,PHF14,PLAUR,PTGES,SIN3A,SIRT6,SMAD3,TGIF1,TSC2,VTN,WRN                                                                                     | CD87              |
| Growth of connective tissue              | 2.71E-06 | 45          | ACP1,ALB,ARHGEF11,ARID3A,BTK,CD109,CEBPB,COL1A1,CSNK1A1,CTC1,EZH2,F2RL1,FADD,FANCD2,FTH1,GOLPH3,GPI,HDGFL2,HGS,HMOX1,KDM2B,KDM5A,KMT2C,KMT5B,LATS1,MEN1,MFN2,MORC3,NDRG1,PKD1,PHF14,PLAUR,PTGES,PTPRF,RRM1,SDC4,SIN3A,SIRT6,SMAD3,SMARCA4,TGIF1,TRAF4,TSC2,VTN,WRN | CD87, CD109       |
| Cell movement of fibroblast cell lines   | 4.31E-06 | 19          | ACP1,ARHGEF11,CLIC4,FHL2,GIT1,GPI,IPO9,KDM2B,LGALS8,NCK1,PALLD,PLAUR,PLG,PODXL2,PTPRA,TRAF4,TSC2,VTN,WASF3                                                                                                                                                         | CD87, CD280       |
| Proliferation of connective tissue cells | 7.36E-06 | 41          | ACP1,ALB,ARHGEF11,ARID3A,CD109,CEBPB,COL1A1,CTC1,EZH2,F2RL1,FADD,FANCD2,FTH1,GOLPH3,GPI,HDGFL2,HGS,HMOX1,KDM2B,KDM5A,KMT2C,KMT5B,LATS1,MEN1,MORC3,NDRG1,PHF14,PLAUR,PTGES,PTPRF,RRM1,SDC4,SIN3A,SIRT6,SMAD3,SMARCA4,TGIF1,TRAF4,TSC2,VTN,WRN                       | CD87, CD109       |
| Migration of fibroblast cell lines       | 3.28E-05 | 14          | ACP1,ARHGEF11,CLIC4,FHL2,KDM2B,NCK1,PALLD,PLAUR,PLG,PTPRA,TRAF4,TSC2,VTN,WASF3                                                                                                                                                                                     | CD87              |
| Binding of fibroblast cell lines         | 8.12E-05 | 11          | ACP1,CDH11,FHL2,IL13RA1,LGALS8,NCK1,PALLD,PLAUR,SDC4,TFPI,TMEM123                                                                                                                                                                                                  | CD87              |
| Cell movement of fibroblasts             | 9.56E-04 | 14          | COL1A1,LRP1,MRC2,NCK1,PALLD,PLAUR,PTPRA,RAP2A,SDC4,SMAD3,SNX17,TNS3,TSC2,VTN                                                                                                                                                                                       | CD87, CD91        |
| Migration of fibroblasts                 | 2.02E-03 | 11          | COL1A1,LRP1,MRC2,PALLD,PLAUR,PTPRA,RAP2A,SDC4,SNX17,TSC2,VTN                                                                                                                                                                                                       | CD87, CD91, CD280 |
| Function of brown adipose tissue         | 2.44E-03 | 3           | CEBPB,KDM3A,RIPK1                                                                                                                                                                                                                                                  | None              |
| Diferentiation of fibroblasts            | 2.79E-03 | 8           | CEBPB,F2RL1,FOXO3,KDM5A,MCAM,PARP2,PLAUR,SMARCA4                                                                                                                                                                                                                   | CD146, CD87       |

## Supplementary Table 15B: Top biological function enriched in 2D cultured cells

### ORGANISMAL SURVIVAL

| Functions Annotation   | p-value  | # Molecules | Molecules                                                                                                                                                                                                                                                                                                                                                                                                                                                                                                                                                                                                                                                                                                                                                                                                                                                                                                                                                                                                                                                                                                                                                                                                                                                                                                                                                                                                                                                                                                                                                                                                                                    | CD Molecules       |
|------------------------|----------|-------------|----------------------------------------------------------------------------------------------------------------------------------------------------------------------------------------------------------------------------------------------------------------------------------------------------------------------------------------------------------------------------------------------------------------------------------------------------------------------------------------------------------------------------------------------------------------------------------------------------------------------------------------------------------------------------------------------------------------------------------------------------------------------------------------------------------------------------------------------------------------------------------------------------------------------------------------------------------------------------------------------------------------------------------------------------------------------------------------------------------------------------------------------------------------------------------------------------------------------------------------------------------------------------------------------------------------------------------------------------------------------------------------------------------------------------------------------------------------------------------------------------------------------------------------------------------------------------------------------------------------------------------------------|--------------------|
| Morbidity or mortality | 3.99E-09 | 260         | <p>                     ABCB10,ABCC1,ABHD5,ABI1,ACADM,ACTL6A,ACTN4,ADGRG6,ADM,AFF4,AGL,AHI1,AKAP13,ALDH5A1,ANTXR1,ARRB1,ATF2,ATF6,ATF6B,ATN1,ATP6V0C,ATP7A,B4GALT1,BARD1,BECN1,BIRC5,BIRC6,BRCA1,CASK,CASZ1,CAV1,CBS/CBSL,CC2D1A,CCDC134,CCNA2,CCNB2,CDK2,CDK2AP1,CEBPD,CHMP5,CIT,CLCN7,CLN3,CNOT3,CNTNAP1,COPS8,CPOX,CSK,CTNNA2,CUX1,DAB2,DAXX,DDR1,DIAPH3,DMD,DPAGT1,DVL2,ECD,ECSIT,EEF1E1,EFEMP1,EHD3,EHD4,EIF4E2,ELOVL1,ELOVL4,EP400,EPHB2,ERBIN,ERCC1,ERCC6,ERCC6L,ERF,ERRF1,EXTL3,FITM2,FLVCR1,FNDC3B,FOS,FOSL1,FTL,GAS2L3,GATA3,GBE1,GCLM,GFAP,GJA1,GJC1,GLCE,GNAZ,GNG5,GPR108,HEXB,HLA-A,HMGCL,HSBP1,HSD3B7,HSPG2,HYAL2,IGF1R,IL27RA,INO80,JUNB,KIF1A,KIF20A,KIF3A,KRT8,LAMC1,LIFR,LIMA1,LIMK1,LRP6,LRP8,LRRC8A,MADD,MAN2A1,MAP1B,MBNL1,MBTPS1,MCL1,MCM3AP,MED24,MELK,MK167,MMACHC,MTA2,MTEK167,MTHFD2,MYH10,MYH9,MYO18A,NCAPG2,NCAPH2,NCOR1,NDC80,NEBL,NF1,NF2,NFATC1,NFIX,NLE1,NOA1,NOP53,NOTCH2,NSUN4,NT5E,NUS1,OAT,PAFAH1B1,PAM,PANK1,PARL,PATZ1,PCYT1A,PDSS2,PEA15,PEX5,PFKM,PGP,PI4KA,PINX1,PISD,PITPNA,PKD2,PLCB1,PLCG1,PLIN2,PLXND1,PNPLA2,PNPLA8,POLB,POLG,POLR2A,POMGNT1,POMGNT2,PPP1R13L,PRKCD,PRMT1,PRPF31,PSMB4,PSMG1,PTBP2,PTK2,PTPN2,PTPN9,PXN,PYGO2,RAD54B,RAD54L,RAF1,RAI1,RB1,RBBP6,RBM38,RFK,RICTOR,RIF1,RPS6KB2,SCARB1,SCD,SHB,SLC16A2,SLC19A1,SLC19A3,SLC20A1,SLC25A19,SLC31A1,SLC39A10,SLC7A5,SMAD4,SMAD5,SMAD9,SMARCA1,SMG1,SOD2,SOS1,SPOUT1,SPRY1,SPRY4,SQSTM1,SRC,SRGAP3,STIM2,STK3,SYNE2,TADA3,TAF6L,TARBP2,TCTN3,TEAD1,TEFM,TELO2,TERF1,TERF2,TFAM,TGFB1,TGM2,TMOD3,TP53,TP53RK,TPP2,TRPM4,TSPYL1,TWNK,TYMP,UHRF1,UIMC1,UNG,UTF1,UTRN,VAC14,VEZF1,VEZT,VPS26A,XPC,YAP1,ZC3HC1,ZNF148                 </p> | CD73, CD118, CD221 |
| Organismal death       | 6.93E-09 | 256         | <p>                     ABCB10,ABCC1,ABHD5,ABI1,ACADM,ACTL6A,ACTN4,ADGRG6,ADM,AFF4,AGL,AHI1,AKAP13,ALDH5A1,ARRHGEF12,ARRB1,ATF2,ATF6,ATF6B,ATN1,ATP6V0C,ATP7A,B4GALT1,BARD1,BECN1,BIRC5,BIRC6,BRCA1,CASK,CASZ1,CAV1,CBS/CBSL,CC2D1A,CCDC134,CCNA2,CCNB2,CDK2,CDK2AP1,CEBPD,CHMP5,CIT,CLCN7,CLN3,CNOT3,CNTNAP1,COPS8,CPOX,CSK,CTNNA2,CUX1,DAB2,DAXX,DDR1,DIAPH3,DMD,DPAGT1,DVL2,ECD,ECSIT,EEF1E1,EFEMP1,EHD3,EHD4,EIF4E2,ELOVL1,ELOVL4,EP400,EPHB2,ERBIN,ERCC1,ERCC6,ERCC6L,ERF,ERRF1,EXTL3,FITM2,FLVCR1,FNDC3B,FOS,FOSL1,FTL,GAS2L3,GATA3,GBE1,GCLM,GFAP,GJA1,GJC1,GLCE,GNG5,HEXB,HMGCL,HSBP1,HSD3B7,HSPG2,HYAL2,IGF1R,IL27RA,INO80,JUNB,KIF1A,KIF20A,KIF3A,KRT8,LAMC1,LIFR,LIMA1,LIMK1,LRP6,LRP8,LRRC8A,MADD,MAN2A1,MAP1B,MBNL1,MBTPS1,MCL1,MCM3AP,MED24,MELK,MK167,MMACHC,MTA2,MTERF3,MTF2,MTHFD2,MYH10,MYH9,MYO18A,NCAPG2,NCAPH2,NCOR1,NDC80,NEBL,NF1,NF2,NFATC1,NFIX,NLE1,NOA1,NOP53,NOTCH2,NSUN4,NT5E,NUS1,OAT,PAFAH1B1,PAM,PANK1,PARL,PATZ1,PCYT1A,PDSS2,PEA15,PEX5,PFKM,PGP,PI4KA,PINX1,PISD,PITPNA,PKD2,PLCB1,PLCG1,PLIN2,PLXND1,PNPLA2,PNPLA8,POLB,POLG,POLR2A,POMGNT1,POMGNT2,PPP1R13L,PRKCD,PRMT1,PRPF31,PSMB4,PSMG1,PTBP2,PTK2,PTPN2,PTPN9,PXN,PYGO2,RAD54B,RAD54L,RAF1,RAI1,RB1,RBBP6,RBM38,RFK,RICTOR,RIF1,RPS6KB2,SCARB1,SCD,SHB,SLC16A2,SLC19A1,SLC19A3,SLC20A1,SLC25A19,SLC31A1,SLC39A10,SLC7A5,SMAD4,SMAD5,SMAD9,SMARCA1,SMG1,SOD2,SOS1,SPOUT1,SPRY1,SPRY4,SQSTM1,SRC,SRGAP3,STIM2,STK3,SYNE2,TADA3,TAF6L,TARBP2,TCTN3,TEAD1,TEFM,TELO2,TERF1,TERF2,TFAM,TGFB1,TGM2,TMOD3,TP53,TP53RK,TPP2,TRPM4,TSPYL1,TWNK,TYMP,UHRF1,UIMC1,UNG,UTF1,UTRN,VAC14,VEZF1,VEZT,VPS26A,XPC,YAP1,ZC3HC1,ZNF148                 </p>            | CD73, CD118, CD221 |

**Supplementary Table 16A: Network analysis – 3D-cultured NCI-H23 cells.** See Supplementary Table 16A

**Supplementary Table 16B: Network analysis – 2D-cultured NCI-H23 cells.** See Supplementary Table 16B
